# Supplementary material for: Positive associations between cannabis and alcohol use polygenic risk scores and phenotypic opioid misuse among African-Americans
Source: PLoS One. 2022 Apr 8;17(4):e0266384. doi: 10.1371/journal.pone.0266384 (PMC8993003; doi:10.1371/journal.pone.0266384)
Supplement: S1 Table — (DOCX) [file pone.0266384.s001.docx]

**Supplementary Table 1. Main effects of the covariates in predicting phenotypic opioid misuse in the whole sample and among males and females**

| **Whole Sample** |  |  |
| --- | --- | --- |
| **Covariate** | **OR (95% CI)** | ***p*** |
| Gender | 0.88 (0.54, 1.40) | 0.59 |
| Intervention status | 1.3 (0.80, 2.10) | 0.29 |
| Cohort | 1.2 (0.91, 1.6) | 0.18 |
| PC1 | 1.90^2 (1.0^-15, 3.5^19) | 0.80 |
| PC2 | 1.27^40 (2.3^-3, 6.0^82) | 0.66 |
| PC3 | 2.7^3 (2.2^-3, 3.5^19) | 0.92 |
| PC4 | 5.4^18 (2.6^-68, 1.1^33) | 0.50 |
| PC5 | 1.9^5 (1.2^-17, 2.9^27) | 0.64 |
| PC6 | 3.8^-9 (1.4^-28, 1.0^11) | 0.40 |
| PC7 | 3.1 (1.1^-11, 9.1^11) | 0.93 |
| PC8 | 2.5^-2 (1.1^-16, 5.6^12) | 0.83 |
| PC9 | 2.6^23 (17, 3.9^45) | 0.39 |
| PC10 | 1.4^11 (5.9^-7, 3.5^28) | 0.21 |
| **Males** |  |  |
| **Covariate** | **OR (95% CI)** | ***p*** |
| Intervention status | 1.2 (0.60, 2.5) | 0.59 |
| Cohort | 1.1 (0.70, 1.7) | 0.73 |
| PC1 | 1.5^8 (6.1^-19, 3.7^34) | 0.54 |
| PC2 | 1.1^3 (2.4^-59, 5.3^65) | 0.92 |
| PC3 | 1.5^6 (2.1^-64, 1.1^76) | 0.86 |
| PC4 | 4.1^-23 (5.4^-95, 3.1^49) | 0.54 |
| PC5 | 1.0^-4 (7.2^-40, 1.4^31) | 0.82 |
| PC6 | 5.5^-2 (1.5^9, 2.1^26) | 0.93 |
| PC7 | 4.8^12 (2.3^-10, 1.0^35) | 0.27 |
| PC8 | 1.4^-2 (4.6^-26, 4.2^21) | 0.88 |
| PC9 | 1.0^15 (1.9^-20, 5.9^49) | 0.40 |
| PC10 | 7.0^23 (1.2^-8, 4.1^55) | 0.14 |
| **Females** |  |  |
| **Covariates** | **OR (95% CI)** | ***p*** |
| Intervention status | 1.4 (0.72, 2.8) | 0.31 |
| Cohort | 1.3 (0.84, 2.8) | 0.26 |
| PC1 | 0.68 (1.1^-25, 4.2^24) | 0.99 |
| PC2 | 2.7^79 (1.5^17, 4.9^141) | 0.12 |
| PC3 | 1.0^-18 (5.8^-87, 1.8^50) | 0.61 |
| PC4 | 1.5^-21 (4.8^-94, 5.0^51) | 0.57 |
| PC5 | 1.3^13 (5.6^-19, 3.2^44) | 0.41 |
| PC6 | 3.8^-15 (4.1^-43, 3.6^13) | 0.31 |
| PC7 | 9.2^-4 (5.2^-21, 1.6^14) | 0.73 |
| PC8 | 4.8^-6 (8.0^-27, 2.9^15) | 0.62 |
| PC9 | 2.6^28 (3.9^-3, 1.7^59) | 0.71 |
| PC10 | 2.8 (4.4^-30, 1.8^30) | 0.98 |
